# Supplementary material for: Gastrodin attenuates renal injury and collagen deposition via suppression of the TGF-β1/Smad2/3 signaling pathway based on network pharmacology analysis
Source: Front Pharmacol. 2023 Jan 17;14:1082281. doi: 10.3389/fphar.2023.1082281 (PMC9887022; doi:10.3389/fphar.2023.1082281)
Supplement: Supplementary file 3 [file Table2.xls]

## Sheet: BP
Enrichment FDR	nGenes	Pathway Genes	Fold Enrichment	Pathway	URL	Genes
6.92303e-16	16	375	24.9392	Cellular response to chemical stress	http://amigo.geneontology.org/amigo/term/GO:0062197	MPO PTGS2 HIF1A MET EPAS1 NFE2L2 PKD2 EPO PPARG IL6 IL10 TLR4 TP53 EGFR LCN2 BCL2
1.07901e-13	14	376	21.7638	Response to hypoxia	http://amigo.geneontology.org/amigo/term/GO:0001666	PTGS2 EDN1 ICAM1 TGFB2 HIF1A TGFB1 VEGFA EPAS1 NFE2L2 EPO TLR2 TP53 BCL2 MTOR
1.14e-11	13	325	23.3805	Cellular response to oxidative stress	http://amigo.geneontology.org/amigo/term/GO:0034599	MPO HIF1A MET EPAS1 NFE2L2 PKD2 IL6 IL10 TLR4 TP53 EGFR LCN2 BCL2
1.14e-11	12	251	27.9448	Cellular response to oxygen levels	http://amigo.geneontology.org/amigo/term/GO:0071453	PTGS2 EDN1 ICAM1 HIF1A VEGFA EPAS1 NFE2L2 EPO PPARG TP53 BCL2 MTOR
5.99e-11	11	217	29.6297	Response to reactive oxygen species	http://amigo.geneontology.org/amigo/term/GO:0000302	MPO EDN1 HIF1A MET NFE2L2 PKD2 IL6 IL10 EGFR LCN2 BCL2
5.99e-11	11	222	28.9623	Cellular response to hypoxia	http://amigo.geneontology.org/amigo/term/GO:0071456	PTGS2 EDN1 ICAM1 HIF1A VEGFA EPAS1 NFE2L2 EPO TP53 BCL2 MTOR
7.78e-11	11	232	27.714	Cellular response to decreased oxygen levels	http://amigo.geneontology.org/amigo/term/GO:0036294	PTGS2 EDN1 ICAM1 HIF1A VEGFA EPAS1 NFE2L2 EPO TP53 BCL2 MTOR
1.43e-09	10	237	24.663	Anatomical structure maturation	http://amigo.geneontology.org/amigo/term/GO:0071695	IGF1 TGFB2 HIF1A VEGFA EPAS1 C3 EPO PPARG BCL2 MTOR
1.7e-09	10	243	24.054	Regulation of epithelial cell migration	http://amigo.geneontology.org/amigo/term/GO:0010632	PTGS2 EDN1 TGFB2 HIF1A MET VEGFA NFE2L2 PPARG EGF MTOR
9.22e-10	9	150	35.0708	Positive regulation of epithelial cell migration	http://amigo.geneontology.org/amigo/term/GO:0010634	PTGS2 EDN1 TGFB2 HIF1A MET VEGFA NFE2L2 EGF MTOR
1.21e-09	9	156	33.7219	Response to glucocorticoid	http://amigo.geneontology.org/amigo/term/GO:0051384	PTGS2 EDN1 ICAM1 TGFB1 EPO IL6 IL10 EGFR BCL2
9.9e-09	9	213	24.6977	Positive regulation of peptidyl-tyrosine phosphorylation	http://amigo.geneontology.org/amigo/term/GO:0050731	IGF1 ICAM1 VEGFA EPO IL6 EGF TP53 ACE MTOR
2.55e-09	9	175	30.0607	Response to corticosteroid	http://amigo.geneontology.org/amigo/term/GO:0031960	PTGS2 EDN1 ICAM1 TGFB1 EPO IL6 IL10 EGFR BCL2
2.55e-09	9	175	30.0607	Tissue remodeling	http://amigo.geneontology.org/amigo/term/GO:0048771	HIF1A CST3 EPAS1 SPP1 PLG IL6 TP53 EGFR ACE
1.93e-08	9	238	22.1034	Positive regulation of neurogenesis	http://amigo.geneontology.org/amigo/term/GO:0050769	HIF1A TGFB1 VEGFA FN1 PPARG IL6 TLR2 EGFR MTOR
1.94e-08	9	239	22.0109	Mesenchymal cell differentiation	http://amigo.geneontology.org/amigo/term/GO:0048762	EDN1 TGFB2 HIF1A TGFB1 FN1 IL6 BCL2 SMAD2 MTOR
7.46e-10	8	89	52.5405	Nitric oxide metabolic process	http://amigo.geneontology.org/amigo/term/GO:0046209	PTGS2 EDN1 ICAM1 PKD2 IL10 TLR4 TLR2 MTOR
7.46e-10	8	90	51.9567	Reactive nitrogen species metabolic process	http://amigo.geneontology.org/amigo/term/GO:2001057	PTGS2 EDN1 ICAM1 PKD2 IL10 TLR4 TLR2 MTOR
1.55e-08	8	151	30.9676	Cellular response to reactive oxygen species	http://amigo.geneontology.org/amigo/term/GO:0034614	MPO MET NFE2L2 PKD2 IL6 IL10 EGFR LCN2
1.94e-08	8	157	29.7841	Regulation of smooth muscle cell proliferation	http://amigo.geneontology.org/amigo/term/GO:0048660	IGF1 PTGS2 EDN1 PPARG IL6 IL10 EGFR MTOR
1.94e-08	8	157	29.7841	Regulation of smooth muscle cell proliferation	http://amigo.geneontology.org/amigo/term/GO:0048660	IGF1 PTGS2 EDN1 PPARG IL6 IL10 EGFR MTOR
2.19e-08	8	160	29.2256	Smooth muscle cell proliferation	http://amigo.geneontology.org/amigo/term/GO:0048659	IGF1 PTGS2 EDN1 PPARG IL6 IL10 EGFR MTOR
4.94e-09	7	70	58.4513	Regulation of nitric oxide biosynthetic process	http://amigo.geneontology.org/amigo/term/GO:0045428	PTGS2 EDN1 ICAM1 PKD2 IL10 TLR4 MTOR
1.07e-08	7	84	48.7094	Nitric oxide biosynthetic process	http://amigo.geneontology.org/amigo/term/GO:0006809	PTGS2 EDN1 ICAM1 PKD2 IL10 TLR4 MTOR
3.57e-08	7	104	39.3422	Positive regulation of smooth muscle cell proliferation	http://amigo.geneontology.org/amigo/term/GO:0048661	IGF1 PTGS2 EDN1 IL6 IL10 EGFR MTOR
4.54e-08	7	108	37.8851	Positive regulation of endothelial cell migration	http://amigo.geneontology.org/amigo/term/GO:0010595	PTGS2 EDN1 HIF1A MET VEGFA NFE2L2 EGF
6.50459e-09	6	52	67.4438	Positive regulation of nitric oxide biosynthetic process	http://amigo.geneontology.org/amigo/term/GO:0045429	PTGS2 EDN1 ICAM1 PKD2 TLR4 MTOR
2.72e-08	6	52	67.4438	Positive regulation of nitric oxide biosynthetic process	http://amigo.geneontology.org/amigo/term/GO:0045429	PTGS2 EDN1 ICAM1 PKD2 TLR4 MTOR
1.22e-07	6	70	50.1011	Positive regulation of gliogenesis	http://amigo.geneontology.org/amigo/term/GO:0014015	TGFB1 PPARG IL6 TLR2 EGFR MTOR
1.34e-07	6	72	48.7094	Negative regulation of calcium ion transport	http://amigo.geneontology.org/amigo/term/GO:0051926	PTGS2 ICAM1 TGFB1 PKD2 EPO BCL2
1.1912e-07	5	41	71.2821	Response to dexamethasone	http://amigo.geneontology.org/amigo/term/GO:0071548	EDN1 ICAM1 TGFB1 EPO EGFR
1.48487e-07	5	43	67.9666	Regulation of transforming growth factor beta production	http://amigo.geneontology.org/amigo/term/GO:0071634	PTGS2 TGFB2 HIF1A FN1 CD46
1.83723e-07	5	45	64.9459	Transforming growth factor beta production	http://amigo.geneontology.org/amigo/term/GO:0071604	PTGS2 TGFB2 HIF1A FN1 CD46
2.96425e-07	5	50	58.4513	Positive regulation of epithelial to mesenchymal transition	http://amigo.geneontology.org/amigo/term/GO:0010718	TGFB2 TGFB1 IL6 SMAD2 MTOR
5.91e-07	5	46	63.534	Positive regulation of pri-miRNA transcription by RNA polymerase II	http://amigo.geneontology.org/amigo/term/GO:1902895	TGFB2 HIF1A PPARG IL10 TP53
2.39157e-09	4	6	389.675	Positive regulation of transcription from RNA polymerase II promoter in response to hypoxia	http://amigo.geneontology.org/amigo/term/GO:0061419	HIF1A VEGFA NFE2L2 TP53
1.14e-08	4	6	389.675	Positive regulation of transcription from RNA polymerase II promoter in response to hypoxia	http://amigo.geneontology.org/amigo/term/GO:0061419	HIF1A VEGFA NFE2L2 TP53
2.90837e-07	4	18	129.892	Negative regulation of calcium ion transport into cytosol	http://amigo.geneontology.org/amigo/term/GO:0010523	TGFB1 PKD2 EPO BCL2
1.62698e-06	4	28	83.5018	Positive regulation of vascular endothelial growth factor production	http://amigo.geneontology.org/amigo/term/GO:0010575	PTGS2 HIF1A C3 IL6
2.64553e-06	3	8	219.192	Positive regulation of cell growth involved in cardiac muscle cell development	http://amigo.geneontology.org/amigo/term/GO:0061051	IGF1 EDN1 MTOR

## Sheet: CC
Enrichment FDR	nGenes	Pathway Genes	Fold Enrichment	Pathway	URL	Genes
9.72966e-11	19	1150	7.10647	Secretory vesicle	http://amigo.geneontology.org/amigo/term/GO:0099503	MPO IGF1 EDN1 TGFB2 CST3 TGFB1 VEGFA FN1 CD46 TTR PLG C3 LGALS3 TLR2 EGF LCN2 ALB CLCN5 B2M
9.72966e-11	18	975	7.94083	Secretory granule	http://amigo.geneontology.org/amigo/term/GO:0030141	MPO IGF1 EDN1 TGFB2 CST3 TGFB1 VEGFA FN1 CD46 TTR PLG C3 LGALS3 TLR2 EGF LCN2 ALB B2M
4.01088e-07	14	960	6.2727	Cell surface	http://amigo.geneontology.org/amigo/term/GO:0009986	ICAM1 TGFB1 MET VEGFA CD46 PLG C3 EPO LGALS3 TLR4 TLR2 EGFR ACE B2M
9.72966e-11	13	374	14.951	Vesicle lumen	http://amigo.geneontology.org/amigo/term/GO:0031983	MPO IGF1 TGFB2 VEGFA FN1 TTR PLG C3 EGF EGFR LCN2 ALB B2M
1.20084e-09	12	368	14.0259	Secretory granule lumen	http://amigo.geneontology.org/amigo/term/GO:0034774	MPO IGF1 TGFB2 VEGFA FN1 TTR PLG C3 EGF LCN2 ALB B2M
1.20084e-09	12	372	13.8751	Cytoplasmic vesicle lumen	http://amigo.geneontology.org/amigo/term/GO:0060205	MPO IGF1 TGFB2 VEGFA FN1 TTR PLG C3 EGF LCN2 ALB B2M
0.0252626	11	1812	2.61115	Golgi apparatus	http://amigo.geneontology.org/amigo/term/GO:0005794	CST3 NFE2L2 PKD2 SPP1 TLR4 TLR2 EGFR ALB CLCN5 MTOR B2M
1.16789e-06	9	328	11.8023	Endoplasmic reticulum lumen	http://amigo.geneontology.org/amigo/term/GO:0005788	PTGS2 EDN1 CST3 FN1 SPP1 C3 IL6 ALB B2M
0.0362027	9	1405	2.75527	Vesicle membrane	http://amigo.geneontology.org/amigo/term/GO:0012506	CD46 PKD2 LGALS3 TLR4 TLR2 EGF EGFR CLCN5 B2M
0.0362027	9	1385	2.79506	Cytoplasmic vesicle membrane	http://amigo.geneontology.org/amigo/term/GO:0030659	CD46 PKD2 LGALS3 TLR4 TLR2 EGF EGFR CLCN5 B2M
8.28887e-09	7	70	43.0128	Platelet alpha granule lumen	http://amigo.geneontology.org/amigo/term/GO:0031093	IGF1 TGFB2 VEGFA FN1 PLG EGF ALB
9.02231e-08	7	100	30.109	Platelet alpha granule	http://amigo.geneontology.org/amigo/term/GO:0031091	IGF1 TGFB2 VEGFA FN1 PLG EGF ALB
0.0010326	7	422	7.13483	Receptor complex	http://amigo.geneontology.org/amigo/term/GO:0043235	MET PPARG IL6 TLR4 TLR2 EGFR B2M
0.00657294	7	601	5.00981	External encapsulating structure	http://amigo.geneontology.org/amigo/term/GO:0030312	ICAM1 TGFB2 TGFB1 VEGFA FN1 PLG LGALS3
0.00657294	7	600	5.01816	Extracellular matrix	http://amigo.geneontology.org/amigo/term/GO:0031012	ICAM1 TGFB2 TGFB1 VEGFA FN1 PLG LGALS3
0.0361923	7	865	3.48081	Lytic vacuole	http://amigo.geneontology.org/amigo/term/GO:0000323	MPO TTR C3 EGF ACE CLCN5 MTOR
0.0361923	7	865	3.48081	Lysosome	http://amigo.geneontology.org/amigo/term/GO:0005764	MPO TTR C3 EGF ACE CLCN5 MTOR
0.00657294	6	421	6.13009	Endocytic vesicle	http://amigo.geneontology.org/amigo/term/GO:0030139	MPO TLR2 EGF EGFR MTOR B2M
0.00783345	6	446	5.78648	Collagen-containing extracellular matrix	http://amigo.geneontology.org/amigo/term/GO:0062023	ICAM1 TGFB2 TGFB1 FN1 PLG LGALS3
0.0362027	5	465	4.62503	Transcription regulator complex	http://amigo.geneontology.org/amigo/term/GO:0005667	HIF1A EPAS1 PPARG TP53 SMAD2
0.00614896	4	140	12.2894	Blood microparticle	http://amigo.geneontology.org/amigo/term/GO:0072562	FN1 PLG C3 ALB
0.0102482	4	177	9.72041	Phagocytic vesicle	http://amigo.geneontology.org/amigo/term/GO:0045335	MPO TLR2 MTOR B2M
0.0169451	4	206	8.352	RNA polymerase II transcription regulator complex	http://amigo.geneontology.org/amigo/term/GO:0090575	HIF1A PPARG TP53 SMAD2
0.0362027	4	273	6.30224	Endocytic vesicle membrane	http://amigo.geneontology.org/amigo/term/GO:0030666	TLR2 EGF EGFR B2M
0.0362027	4	283	6.07955	Basal part of cell	http://amigo.geneontology.org/amigo/term/GO:0045178	EDN1 MET PKD2 EGFR
0.0546587	4	360	4.7792	Membrane raft	http://amigo.geneontology.org/amigo/term/GO:0045121	PTGS2 ICAM1 TLR2 EGFR
0.0228025	3	105	12.2894	Azurophil granule lumen	http://amigo.geneontology.org/amigo/term/GO:0035578	MPO TTR C3
0.0496134	3	170	7.5905	Primary lysosome	http://amigo.geneontology.org/amigo/term/GO:0005766	MPO TTR C3
0.0496134	3	170	7.5905	Azurophil granule	http://amigo.geneontology.org/amigo/term/GO:0042582	MPO TTR C3
0.0496134	1	3	143.376	Interleukin-6 receptor complex	http://amigo.geneontology.org/amigo/term/GO:0005896	IL6
0.0496134	1	3	143.376	Activin responsive factor complex	http://amigo.geneontology.org/amigo/term/GO:0032444	SMAD2
0.0546587	1	5	86.0256	Inner acrosomal membrane	http://amigo.geneontology.org/amigo/term/GO:0002079	CD46
0.0546587	1	5	86.0256	Insulin-like growth factor binding protein complex	http://amigo.geneontology.org/amigo/term/GO:0016942	IGF1
0.0546587	1	4	107.532	Early endosome lumen	http://amigo.geneontology.org/amigo/term/GO:0031905	B2M
0.0546587	1	4	107.532	Alphav-beta3 integrin-IGF-1-IGF1R complex	http://amigo.geneontology.org/amigo/term/GO:0035867	IGF1
0.0546587	1	5	86.0256	Growth factor complex	http://amigo.geneontology.org/amigo/term/GO:0036454	IGF1
0.0546587	1	4	107.532	Insulin-like growth factor ternary complex	http://amigo.geneontology.org/amigo/term/GO:0042567	IGF1
0.0546587	1	5	86.0256	Basal cortex	http://amigo.geneontology.org/amigo/term/GO:0045180	PKD2
0.0546587	1	5	86.0256	Lipopolysaccharide receptor complex	http://amigo.geneontology.org/amigo/term/GO:0046696	TLR4
0.0546587	1	5	86.0256	Phagocytic vesicle lumen	http://amigo.geneontology.org/amigo/term/GO:0097013	MPO

## Sheet: MF
Enrichment FDR	nGenes	Pathway Genes	Fold Enrichment	Pathway	URL	Genes
0.000534467	11	1139	4.38356	Protein dimerization activity	http://amigo.geneontology.org/amigo/term/GO:0046983	PTGS2 TGFB2 HIF1A VEGFA EPAS1 PKD2 IL10 TLR4 TP53 BCL2 B2M
0.000125936	10	761	5.96449	Protein domain specific binding	http://amigo.geneontology.org/amigo/term/GO:0019904	HIF1A FN1 NFE2L2 PKD2 PLG PPARG TP53 BCL2 SMAD2 MTOR
0.000729154	8	596	6.09258	Transcription factor binding	http://amigo.geneontology.org/amigo/term/GO:0008134	HIF1A EPAS1 NFE2L2 PPARG TP53 BCL2 SMAD2 MTOR
3.90222e-06	7	165	19.2563	Growth factor activity	http://amigo.geneontology.org/amigo/term/GO:0008083	IGF1 TGFB2 TGFB1 VEGFA IL6 IL10 EGF
1.95289e-05	7	224	14.1843	Phosphatase binding	http://amigo.geneontology.org/amigo/term/GO:0019902	MET LGALS3 PPARG TP53 EGFR BCL2 SMAD2
6.06561e-05	6	170	16.0199	Protein phosphatase binding	http://amigo.geneontology.org/amigo/term/GO:0019903	MET LGALS3 PPARG TP53 EGFR BCL2
0.000534467	5	159	14.2735	Protease binding	http://amigo.geneontology.org/amigo/term/GO:0002020	CST3 FN1 TP53 LCN2 BCL2
0.000534467	5	152	14.9308	Integrin binding	http://amigo.geneontology.org/amigo/term/GO:0005178	IGF1 ICAM1 FN1 SPP1 EGFR
0.000895316	4	94	19.3148	Exogenous protein binding	http://amigo.geneontology.org/amigo/term/GO:0140272	ICAM1 CD46 EGFR ALB
0.000998396	4	98	18.5264	Amyloid-beta binding	http://amigo.geneontology.org/amigo/term/GO:0001540	TGFB2 CST3 TLR4 TLR2
0.00162701	4	114	15.9262	Chaperone binding	http://amigo.geneontology.org/amigo/term/GO:0051087	FN1 PLG TP53 ALB
0.00257771	4	130	13.9661	Hormone activity	http://amigo.geneontology.org/amigo/term/GO:0005179	IGF1 EDN1 TTR EPO
0.00358895	4	145	12.5213	Growth factor receptor binding	http://amigo.geneontology.org/amigo/term/GO:0070851	VEGFA IL6 IL10 EGF
0.000534467	3	25	54.4677	Transforming growth factor beta receptor binding	http://amigo.geneontology.org/amigo/term/GO:0005160	TGFB2 TGFB1 SMAD2
0.000629778	3	28	48.6319	Histone acetyltransferase binding	http://amigo.geneontology.org/amigo/term/GO:0035035	HIF1A EPAS1 TP53
0.00119791	3	38	35.834	Disordered domain specific binding	http://amigo.geneontology.org/amigo/term/GO:0097718	FN1 TP53 SMAD2
0.00333025	3	56	24.3159	Extracellular matrix binding	http://amigo.geneontology.org/amigo/term/GO:0050840	VEGFA SPP1 LGALS3
0.00083947	2	5	181.559	Lipopolysaccharide immune receptor activity	http://amigo.geneontology.org/amigo/term/GO:0001875	TLR4 TLR2
0.00373097	2	12	75.6496	Macrolide binding	http://amigo.geneontology.org/amigo/term/GO:0005527	LCN2 ALB
0.00602313	2	16	56.7372	NAD+ nucleosidase activity	http://amigo.geneontology.org/amigo/term/GO:0003953	TLR4 TLR2
0.00602313	2	16	56.7372	NAD(P)+ nucleosidase activity	http://amigo.geneontology.org/amigo/term/GO:0050135	TLR4 TLR2
0.00602313	2	16	56.7372	NAD+ nucleotidase, cyclic ADP-ribose generating	http://amigo.geneontology.org/amigo/term/GO:0061809	TLR4 TLR2
0.0752989	1	15	30.2598	Muscle alpha-actinin binding	http://amigo.geneontology.org/amigo/term/GO:0051371	PKD2
0.0752989	1	15	30.2598	I-SMAD binding	http://amigo.geneontology.org/amigo/term/GO:0070411	SMAD2
0.0790265	1	16	28.3686	Insulin-like growth factor receptor binding	http://amigo.geneontology.org/amigo/term/GO:0005159	IGF1
0.0790265	1	16	28.3686	Vascular endothelial growth factor receptor binding	http://amigo.geneontology.org/amigo/term/GO:0005172	VEGFA
0.0322316	1	3	151.299	RNA polymerase III type 1 promoter sequence-specific DNA binding	http://amigo.geneontology.org/amigo/term/GO:0001002	MTOR
0.0322316	1	3	151.299	Tripeptidyl-peptidase activity	http://amigo.geneontology.org/amigo/term/GO:0008240	ACE
0.0322316	1	3	151.299	Peptidyl-dipeptidase activity	http://amigo.geneontology.org/amigo/term/GO:0008241	ACE
0.0322316	1	3	151.299	Endothelin B receptor binding	http://amigo.geneontology.org/amigo/term/GO:0031708	EDN1
0.0322316	1	3	151.299	Type III transforming growth factor beta receptor binding	http://amigo.geneontology.org/amigo/term/GO:0034714	TGFB2
0.0322316	1	3	151.299	Vascular endothelial growth factor receptor 1 binding	http://amigo.geneontology.org/amigo/term/GO:0043183	VEGFA
0.0322316	1	3	151.299	5S rDNA binding	http://amigo.geneontology.org/amigo/term/GO:0080084	MTOR
0.0350213	1	4	113.474	RNA polymerase III general transcription initiation factor binding	http://amigo.geneontology.org/amigo/term/GO:0001025	MTOR
0.0350213	1	4	113.474	TFIIIC-class transcription factor complex binding	http://amigo.geneontology.org/amigo/term/GO:0001156	MTOR
0.0350213	1	4	113.474	Bombesin receptor binding	http://amigo.geneontology.org/amigo/term/GO:0031705	EDN1
0.0350213	1	4	113.474	Histone deacetylase regulator activity	http://amigo.geneontology.org/amigo/term/GO:0035033	TP53
0.0350213	1	4	113.474	HLH domain binding	http://amigo.geneontology.org/amigo/term/GO:0043398	PKD2
0.0350213	1	4	113.474	Epidermal growth factor binding	http://amigo.geneontology.org/amigo/term/GO:0048408	EGFR
0.0350213	1	4	113.474	Calcium-induced calcium release activity	http://amigo.geneontology.org/amigo/term/GO:0048763	PKD2
0.0350213	1	4	113.474	DNA binding domain binding	http://amigo.geneontology.org/amigo/term/GO:0050692	PPARG

## Sheet: KEGG
Enrichment FDR	nGenes	Pathway Genes	Fold Enrichment	Pathway	URL	Genes
1.5189e-12	20	530	8.25905	Pathways in cancer	http://www.genome.jp/kegg-bin/show_pathway?hsa05200	IGF1 PTGS2 EDN1 TGFB2 HIF1A TGFB1 MET VEGFA FN1 EPAS1 NFE2L2 EPO PPARG IL6 EGF TP53 EGFR BCL2 SMAD2 MTOR
7.85412e-12	14	202	15.1689	Proteoglycans in cancer	http://www.genome.jp/kegg-bin/show_pathway?hsa05205	IGF1 TGFB2 HIF1A TGFB1 MET VEGFA FN1 TLR4 TLR2 TP53 EGFR SMAD2 MTOR TNF
4.66425e-09	14	354	8.65567	PI3K-Akt signaling pathway	http://www.genome.jp/kegg-bin/show_pathway?hsa04151	IGF1 MET VEGFA FN1 SPP1 EPO IL6 TLR4 TLR2 EGF TP53 EGFR BCL2 MTOR
4.64342e-11	11	109	22.0873	HIF-1 signaling pathway	http://www.genome.jp/kegg-bin/show_pathway?hsa04066	IGF1 EDN1 HIF1A VEGFA EPO IL6 TLR4 EGF EGFR BCL2 MTOR
4.70327e-10	10	100	21.8865	AGE-RAGE signaling pathway in diabetic complications	http://www.genome.jp/kegg-bin/show_pathway?hsa04933	EDN1 ICAM1 TGFB2 TGFB1 VEGFA FN1 IL6 BCL2 SMAD2 TNF
4.70327e-10	10	101	21.6698	Chagas disease	http://www.genome.jp/kegg-bin/show_pathway?hsa05142	TGFB2 TGFB1 C3 IL6 IL10 TLR4 TLR2 ACE SMAD2 TNF
3.38521e-11	9	49	40.1997	Malaria	http://www.genome.jp/kegg-bin/show_pathway?hsa05144	ICAM1 TGFB2 TGFB1 MET IL6 IL10 TLR4 TLR2 TNF
1.76879e-07	9	148	13.3093	Gastric cancer	http://www.genome.jp/kegg-bin/show_pathway?hsa05226	TGFB2 TGFB1 MET EGF TP53 EGFR BCL2 SMAD2 MTOR
8.69769e-07	9	179	11.0044	Tuberculosis	http://www.genome.jp/kegg-bin/show_pathway?hsa05152	TGFB2 TGFB1 C3 IL6 IL10 TLR4 TLR2 BCL2 TNF
3.5717e-06	9	214	9.2046	Lipid and atherosclerosis	http://www.genome.jp/kegg-bin/show_pathway?hsa05417	ICAM1 NFE2L2 PPARG IL6 TLR4 TLR2 TP53 BCL2 TNF
3.03571e-05	9	294	6.69994	MAPK signaling pathway	http://www.genome.jp/kegg-bin/show_pathway?hsa04010	IGF1 TGFB2 TGFB1 MET VEGFA EGF TP53 EGFR TNF
6.81324e-05	9	331	5.95101	Human papillomavirus infection	http://www.genome.jp/kegg-bin/show_pathway?hsa05165	PTGS2 VEGFA FN1 SPP1 EGF TP53 EGFR MTOR TNF
8.21608e-09	8	65	26.9372	Inflammatory bowel disease	http://www.genome.jp/kegg-bin/show_pathway?hsa05321	TGFB2 TGFB1 IL6 IL10 TLR4 TLR2 SMAD2 TNF
2.3704e-08	8	76	23.0384	Leishmaniasis	http://www.genome.jp/kegg-bin/show_pathway?hsa05140	PTGS2 TGFB2 TGFB1 C3 IL10 TLR4 TLR2 TNF
2.3704e-08	8	76	23.0384	Pancreatic cancer	http://www.genome.jp/kegg-bin/show_pathway?hsa05212	TGFB2 TGFB1 VEGFA EGF TP53 EGFR SMAD2 MTOR
2.95296e-08	8	79	22.1635	EGFR tyrosine kinase inhibitor resistance	http://www.genome.jp/kegg-bin/show_pathway?hsa01521	IGF1 MET VEGFA IL6 EGF EGFR BCL2 MTOR
5.38311e-08	8	86	20.3595	Colorectal cancer	http://www.genome.jp/kegg-bin/show_pathway?hsa05210	TGFB2 TGFB1 EGF TP53 EGFR BCL2 SMAD2 MTOR
8.55062e-08	8	92	19.0317	Rheumatoid arthritis	http://www.genome.jp/kegg-bin/show_pathway?hsa05323	ICAM1 TGFB2 TGFB1 VEGFA IL6 TLR4 TLR2 TNF
1.76879e-07	8	102	17.1659	Amoebiasis	http://www.genome.jp/kegg-bin/show_pathway?hsa05146	TGFB2 TGFB1 FN1 IL6 IL10 TLR4 TLR2 TNF
4.48724e-06	8	161	10.8753	Hepatitis B	http://www.genome.jp/kegg-bin/show_pathway?hsa05161	TGFB2 TGFB1 IL6 TLR4 TLR2 TP53 BCL2 TNF
4.48724e-06	8	161	10.8753	MicroRNAs in cancer	http://www.genome.jp/kegg-bin/show_pathway?hsa05206	PTGS2 TGFB2 MET VEGFA TP53 EGFR BCL2 MTOR
5.16178e-06	8	167	10.4845	Hepatocellular carcinoma	http://www.genome.jp/kegg-bin/show_pathway?hsa05225	TGFB2 TGFB1 MET NFE2L2 TP53 EGFR SMAD2 MTOR
1.47851e-05	8	194	9.02536	Kaposi sarcoma-associated herpesvirus infection	http://www.genome.jp/kegg-bin/show_pathway?hsa05167	PTGS2 ICAM1 HIF1A VEGFA C3 IL6 TP53 MTOR
1.72081e-05	8	200	8.75459	Focal adhesion	http://www.genome.jp/kegg-bin/show_pathway?hsa04510	IGF1 MET VEGFA FN1 SPP1 EGF EGFR BCL2
3.16069e-05	8	222	7.88702	Human T-cell leukemia virus 1 infection	http://www.genome.jp/kegg-bin/show_pathway?hsa05166	ICAM1 TGFB2 TGFB1 IL6 TP53 SMAD2 TNF B2M
3.27541e-05	8	224	7.8166	Human cytomegalovirus infection	http://www.genome.jp/kegg-bin/show_pathway?hsa05163	PTGS2 VEGFA IL6 TP53 EGFR MTOR TNF B2M
0.00388458	8	495	3.53721	Herpes simplex virus 1 infection	http://www.genome.jp/kegg-bin/show_pathway?hsa05168	C3 IL6 TLR2 TP53 BCL2 MTOR TNF B2M
1.41342e-06	7	90	17.0228	Hypertrophic cardiomyopathy	http://www.genome.jp/kegg-bin/show_pathway?hsa05410	IGF1 EDN1 TGFB2 TGFB1 IL6 ACE TNF
4.92863e-06	7	112	13.6791	Toxoplasmosis	http://www.genome.jp/kegg-bin/show_pathway?hsa05145	TGFB2 TGFB1 IL10 TLR4 TLR2 BCL2 TNF
1.30791e-05	7	131	11.6951	FoxO signaling pathway	http://www.genome.jp/kegg-bin/show_pathway?hsa04068	IGF1 TGFB2 TGFB1 IL6 IL10 EGF EGFR
1.71305e-05	7	138	11.1018	Fluid shear stress and atherosclerosis	http://www.genome.jp/kegg-bin/show_pathway?hsa05418	EDN1 ICAM1 VEGFA NFE2L2 TP53 BCL2 TNF
3.80769e-05	7	162	9.45712	JAK-STAT signaling pathway	http://www.genome.jp/kegg-bin/show_pathway?hsa04630	EPO IL6 IL10 EGF EGFR BCL2 MTOR
0.000133242	7	202	7.58443	Epstein-Barr virus infection	http://www.genome.jp/kegg-bin/show_pathway?hsa05169	ICAM1 IL6 TLR2 TP53 BCL2 TNF B2M
0.000287584	7	232	6.60368	Coronavirus disease	http://www.genome.jp/kegg-bin/show_pathway?hsa05171	C3 IL6 TLR4 TLR2 EGFR ACE TNF
0.000390599	7	246	6.22786	Shigellosis	http://www.genome.jp/kegg-bin/show_pathway?hsa05131	C3 TLR4 TP53 EGFR BCL2 MTOR TNF
4.67486e-06	6	68	19.3116	Renal cell carcinoma	http://www.genome.jp/kegg-bin/show_pathway?hsa05211	TGFB2 HIF1A TGFB1 MET VEGFA EPAS1
1.73692e-05	6	89	14.7549	PD-L1 expression and PD-1 checkpoint pathway in cancer	http://www.genome.jp/kegg-bin/show_pathway?hsa05235	HIF1A TLR4 TLR2 EGF EGFR MTOR
2.77749e-05	6	97	13.538	Prostate cancer	http://www.genome.jp/kegg-bin/show_pathway?hsa05215	IGF1 EGF TP53 EGFR BCL2 MTOR
0.000148174	6	139	9.4474	Measles	http://www.genome.jp/kegg-bin/show_pathway?hsa05162	CD46 IL6 TLR4 TLR2 TP53 BCL2
0.000270721	6	156	8.41788	Cellular senescence	http://www.genome.jp/kegg-bin/show_pathway?hsa04218	TGFB2 TGFB1 IL6 TP53 SMAD2 MTOR
0.000695502	6	190	6.91152	Neutrophil extracellular trap formation	http://www.genome.jp/kegg-bin/show_pathway?hsa04613	MPO C3 TLR4 TLR2 CLCN5 MTOR
0.000722439	6	192	6.83953	Transcriptional misregulation in cancer	http://www.genome.jp/kegg-bin/show_pathway?hsa05202	MPO IGF1 MET PPARG IL6 TP53
0.0011104	6	210	6.25328	Human immunodeficiency virus 1 infection	http://www.genome.jp/kegg-bin/show_pathway?hsa05170	TLR4 TLR2 BCL2 MTOR TNF B2M
0.00147876	6	223	5.88874	Chemical carcinogenesis	http://www.genome.jp/kegg-bin/show_pathway?hsa05208	HIF1A MET VEGFA NFE2L2 EGF EGFR
0.00502561	6	294	4.46663	Cytokine-cytokine receptor interaction	http://www.genome.jp/kegg-bin/show_pathway?hsa04060	TGFB2 TGFB1 EPO IL6 IL10 TNF
3.16069e-05	5	57	19.1987	Legionellosis	http://www.genome.jp/kegg-bin/show_pathway?hsa05134	C3 IL6 TLR4 TLR2 TNF
7.54706e-05	5	70	15.6332	Central carbon metabolism in cancer	http://www.genome.jp/kegg-bin/show_pathway?hsa05230	HIF1A MET TP53 EGFR MTOR
8.43301e-05	5	72	15.1989	Melanoma	http://www.genome.jp/kegg-bin/show_pathway?hsa05218	IGF1 MET EGF TP53 EGFR
0.00010029	5	75	14.591	Glioma	http://www.genome.jp/kegg-bin/show_pathway?hsa05214	IGF1 EGF TP53 EGFR MTOR
0.000101649	5	76	14.399	Pertussis	http://www.genome.jp/kegg-bin/show_pathway?hsa05133	C3 IL6 IL10 TLR4 TNF
0.000270721	5	95	11.5192	Endocrine resistance	http://www.genome.jp/kegg-bin/show_pathway?hsa01522	IGF1 TP53 EGFR BCL2 MTOR
0.000374948	5	103	10.6245	Toll-like receptor signaling pathway	http://www.genome.jp/kegg-bin/show_pathway?hsa04620	SPP1 IL6 TLR4 TLR2 TNF
0.000384407	5	104	10.5223	NF-kappa B signaling pathway	http://www.genome.jp/kegg-bin/show_pathway?hsa04064	PTGS2 ICAM1 TLR4 BCL2 TNF
0.000441438	5	108	10.1326	Th17 cell differentiation	http://www.genome.jp/kegg-bin/show_pathway?hsa04659	HIF1A TGFB1 IL6 SMAD2 MTOR
0.00051402	5	112	9.77075	TNF signaling pathway	http://www.genome.jp/kegg-bin/show_pathway?hsa04668	PTGS2 EDN1 ICAM1 IL6 TNF
0.000941613	5	129	8.48313	Relaxin signaling pathway	http://www.genome.jp/kegg-bin/show_pathway?hsa04926	EDN1 TGFB1 VEGFA EGFR SMAD2
0.00117919	5	137	7.98777	Yersinia infection	http://www.genome.jp/kegg-bin/show_pathway?hsa05135	FN1 IL6 IL10 TLR4 TNF
0.00157561	5	147	7.44438	Breast cancer	http://www.genome.jp/kegg-bin/show_pathway?hsa05224	IGF1 EGF TP53 EGFR MTOR
0.00275693	5	171	6.39956	Influenza A	http://www.genome.jp/kegg-bin/show_pathway?hsa05164	ICAM1 PLG IL6 TLR4 TNF
0.00541824	5	203	5.39076	Diabetic cardiomyopathy	http://www.genome.jp/kegg-bin/show_pathway?hsa05415	TGFB2 TGFB1 ACE SMAD2 MTOR
0.00596011	5	210	5.21107	Rap1 signaling pathway	http://www.genome.jp/kegg-bin/show_pathway?hsa04015	IGF1 MET VEGFA EGF EGFR
0.00876239	5	231	4.73733	Ras signaling pathway	http://www.genome.jp/kegg-bin/show_pathway?hsa04014	IGF1 MET VEGFA EGF EGFR
0.0114733	5	249	4.39488	Salmonella infection	http://www.genome.jp/kegg-bin/show_pathway?hsa05132	IL6 TLR4 TLR2 BCL2 TNF
0.0925282	5	475	2.30384	Pathways of neurodegeneration	http://www.genome.jp/kegg-bin/show_pathway?hsa05022	PTGS2 IL6 BCL2 MTOR TNF
0.000101649	4	37	23.6611	African trypanosomiasis	http://www.genome.jp/kegg-bin/show_pathway?hsa05143	ICAM1 IL6 IL10 TNF
0.000145815	4	41	21.3527	Bladder cancer	http://www.genome.jp/kegg-bin/show_pathway?hsa05219	VEGFA EGF TP53 EGFR
0.00102243	4	72	12.1592	Non-small cell lung cancer	http://www.genome.jp/kegg-bin/show_pathway?hsa05223	MET EGF TP53 EGFR
0.00210451	4	89	9.83662	Longevity regulating pathway	http://www.genome.jp/kegg-bin/show_pathway?hsa04211	IGF1 PPARG TP53 MTOR
0.00234586	4	92	9.51586	Small cell lung cancer	http://www.genome.jp/kegg-bin/show_pathway?hsa05222	PTGS2 FN1 TP53 BCL2
0.00236576	4	93	9.41354	TGF-beta signaling pathway	http://www.genome.jp/kegg-bin/show_pathway?hsa04350	TGFB2 TGFB1 SMAD2 TNF
0.00236576	4	93	9.41354	IL-17 signaling pathway	http://www.genome.jp/kegg-bin/show_pathway?hsa04657	PTGS2 IL6 LCN2 TNF
0.00242439	4	94	9.3134	Staphylococcus aureus infection	http://www.genome.jp/kegg-bin/show_pathway?hsa05150	ICAM1 PLG C3 IL10
0.00258349	4	96	9.11937	Dilated cardiomyopathy	http://www.genome.jp/kegg-bin/show_pathway?hsa05414	IGF1 TGFB2 TGFB1 TNF
0.00274876	4	98	8.93326	Choline metabolism in cancer	http://www.genome.jp/kegg-bin/show_pathway?hsa05231	HIF1A EGF EGFR MTOR
0.00333036	4	104	8.41788	C-type lectin receptor signaling pathway	http://www.genome.jp/kegg-bin/show_pathway?hsa04625	PTGS2 IL6 IL10 TNF
0.00596011	4	126	6.94809	Cell cycle	http://www.genome.jp/kegg-bin/show_pathway?hsa04110	TGFB2 TGFB1 TP53 SMAD2
0.00596011	4	126	6.94809	Osteoclast differentiation	http://www.genome.jp/kegg-bin/show_pathway?hsa04380	TGFB2 TGFB1 PPARG TNF
0.00876239	4	141	6.20893	Alcoholic liver disease	http://www.genome.jp/kegg-bin/show_pathway?hsa04936	C3 IL6 TLR4 TNF
0.0108619	4	151	5.79774	Phagosome	http://www.genome.jp/kegg-bin/show_pathway?hsa04145	MPO C3 TLR4 TLR2
0.0114907	4	155	5.64813	Non-alcoholic fatty liver disease	http://www.genome.jp/kegg-bin/show_pathway?hsa04932	TGFB1 PPARG IL6 TNF
0.0118816	4	157	5.57617	Hepatitis C	http://www.genome.jp/kegg-bin/show_pathway?hsa05160	EGF TP53 EGFR TNF
0.0180846	4	180	4.86366	NOD-like receptor signaling pathway	http://www.genome.jp/kegg-bin/show_pathway?hsa04621	IL6 TLR4 BCL2 TNF
0.0418459	4	240	3.64775	Calcium signaling pathway	http://www.genome.jp/kegg-bin/show_pathway?hsa04020	MET VEGFA EGF EGFR
0.117785	4	363	2.41173	Amyotrophic lateral sclerosis	http://www.genome.jp/kegg-bin/show_pathway?hsa05014	TP53 BCL2 MTOR TNF
0.134973	4	383	2.28579	Alzheimer disease	http://www.genome.jp/kegg-bin/show_pathway?hsa05010	PTGS2 IL6 MTOR TNF
0.00375353	3	49	13.3999	Intestinal immune network for IgA production	http://www.genome.jp/kegg-bin/show_pathway?hsa04672	TGFB1 IL6 IL10
0.00569841	3	58	11.3206	Endometrial cancer	http://www.genome.jp/kegg-bin/show_pathway?hsa05213	EGF TP53 EGFR
0.0101372	3	73	8.99445	P53 signaling pathway	http://www.genome.jp/kegg-bin/show_pathway?hsa04115	IGF1 TP53 BCL2
0.0110741	3	76	8.6394	Chronic myeloid leukemia	http://www.genome.jp/kegg-bin/show_pathway?hsa05220	TGFB2 TGFB1 TP53
0.0137978	3	84	7.8166	ErbB signaling pathway	http://www.genome.jp/kegg-bin/show_pathway?hsa04012	EGF EGFR MTOR
0.0137978	3	84	7.8166	Complement and coagulation cascades	http://www.genome.jp/kegg-bin/show_pathway?hsa04610	CD46 PLG C3
0.0204961	3	99	6.63227	Viral protein interaction with cytokine and cytokine receptor	http://www.genome.jp/kegg-bin/show_pathway?hsa04061	IL6 IL10 TNF
0.0204961	3	99	6.63227	Hematopoietic cell lineage	http://www.genome.jp/kegg-bin/show_pathway?hsa04640	EPO IL6 TNF
0.0251209	3	108	6.07958	Insulin resistance	http://www.genome.jp/kegg-bin/show_pathway?hsa04931	IL6 MTOR TNF
0.0318878	3	119	5.5176	Sphingolipid signaling pathway	http://www.genome.jp/kegg-bin/show_pathway?hsa04071	TP53 BCL2 TNF
0.0322712	3	120	5.47162	AMPK signaling pathway	http://www.genome.jp/kegg-bin/show_pathway?hsa04152	IGF1 PPARG MTOR
0.0326557	3	121	5.4264	Thyroid hormone signaling pathway	http://www.genome.jp/kegg-bin/show_pathway?hsa04919	HIF1A TP53 MTOR
0.0418459	3	135	4.86366	Apoptosis	http://www.genome.jp/kegg-bin/show_pathway?hsa04210	TP53 BCL2 TNF
0.0422471	3	136	4.8279	Systemic lupus erythematosus	http://www.genome.jp/kegg-bin/show_pathway?hsa05322	C3 IL10 TNF
0.0434619	3	138	4.75793	Apelin signaling pathway	http://www.genome.jp/kegg-bin/show_pathway?hsa04371	SPP1 SMAD2 MTOR
0.0455173	3	141	4.6567	Autophagy	http://www.genome.jp/kegg-bin/show_pathway?hsa04140	HIF1A BCL2 MTOR
0.0506071	3	148	4.43645	Phospholipase D signaling pathway	http://www.genome.jp/kegg-bin/show_pathway?hsa04072	EGF EGFR MTOR
0.0549924	3	154	4.2636	MTOR signaling pathway	http://www.genome.jp/kegg-bin/show_pathway?hsa04150	IGF1 MTOR TNF
0.0572325	3	157	4.18213	Hippo signaling pathway	http://www.genome.jp/kegg-bin/show_pathway?hsa04390	TGFB2 TGFB1 SMAD2
0.058568	3	159	4.12953	Necroptosis	http://www.genome.jp/kegg-bin/show_pathway?hsa04217	TLR4 BCL2 TNF
0.0900564	3	197	3.33297	Pathogenic Escherichia coli infection	http://www.genome.jp/kegg-bin/show_pathway?hsa05130	IL6 TLR4 TNF
0.110401	3	217	3.02578	Regulation of actin cytoskeleton	http://www.genome.jp/kegg-bin/show_pathway?hsa04810	FN1 EGF EGFR
0.0180644	2	31	14.1203	Antifolate resistance	http://www.genome.jp/kegg-bin/show_pathway?hsa01523	IL6 TNF
0.0180644	2	31	14.1203	Asthma	http://www.genome.jp/kegg-bin/show_pathway?hsa05310	IL10 TNF
0.0243387	2	37	11.8305	Thyroid cancer	http://www.genome.jp/kegg-bin/show_pathway?hsa05216	PPARG TP53
0.0251209	2	38	11.5192	Allograft rejection	http://www.genome.jp/kegg-bin/show_pathway?hsa05330	IL10 TNF
0.0300493	2	42	10.4221	Graft-versus-host disease	http://www.genome.jp/kegg-bin/show_pathway?hsa05332	IL6 TNF
0.0342836	2	46	9.51586	Type II diabetes mellitus	http://www.genome.jp/kegg-bin/show_pathway?hsa04930	MTOR TNF
0.0412237	2	51	8.58294	Ovarian steroidogenesis	http://www.genome.jp/kegg-bin/show_pathway?hsa04913	IGF1 PTGS2
